# Supplementary material for: The Metagenome of Utricularia gibba's Traps: Into the Microbial Input to a Carnivorous Plant
Source: PubMed Central journal article supplement (PMC4747601; doi:10.1371/journal.pone.0148979), 2016-02-09
Supplement: pone.0148979.s002.pdf [file pone.0148979.s002.pdf]

| model   | #pos | #bps | #seqs | description                      |
|---------|------|------|-------|----------------------------------|
| archaea | 1508 | 471  | 23    | information content per position |

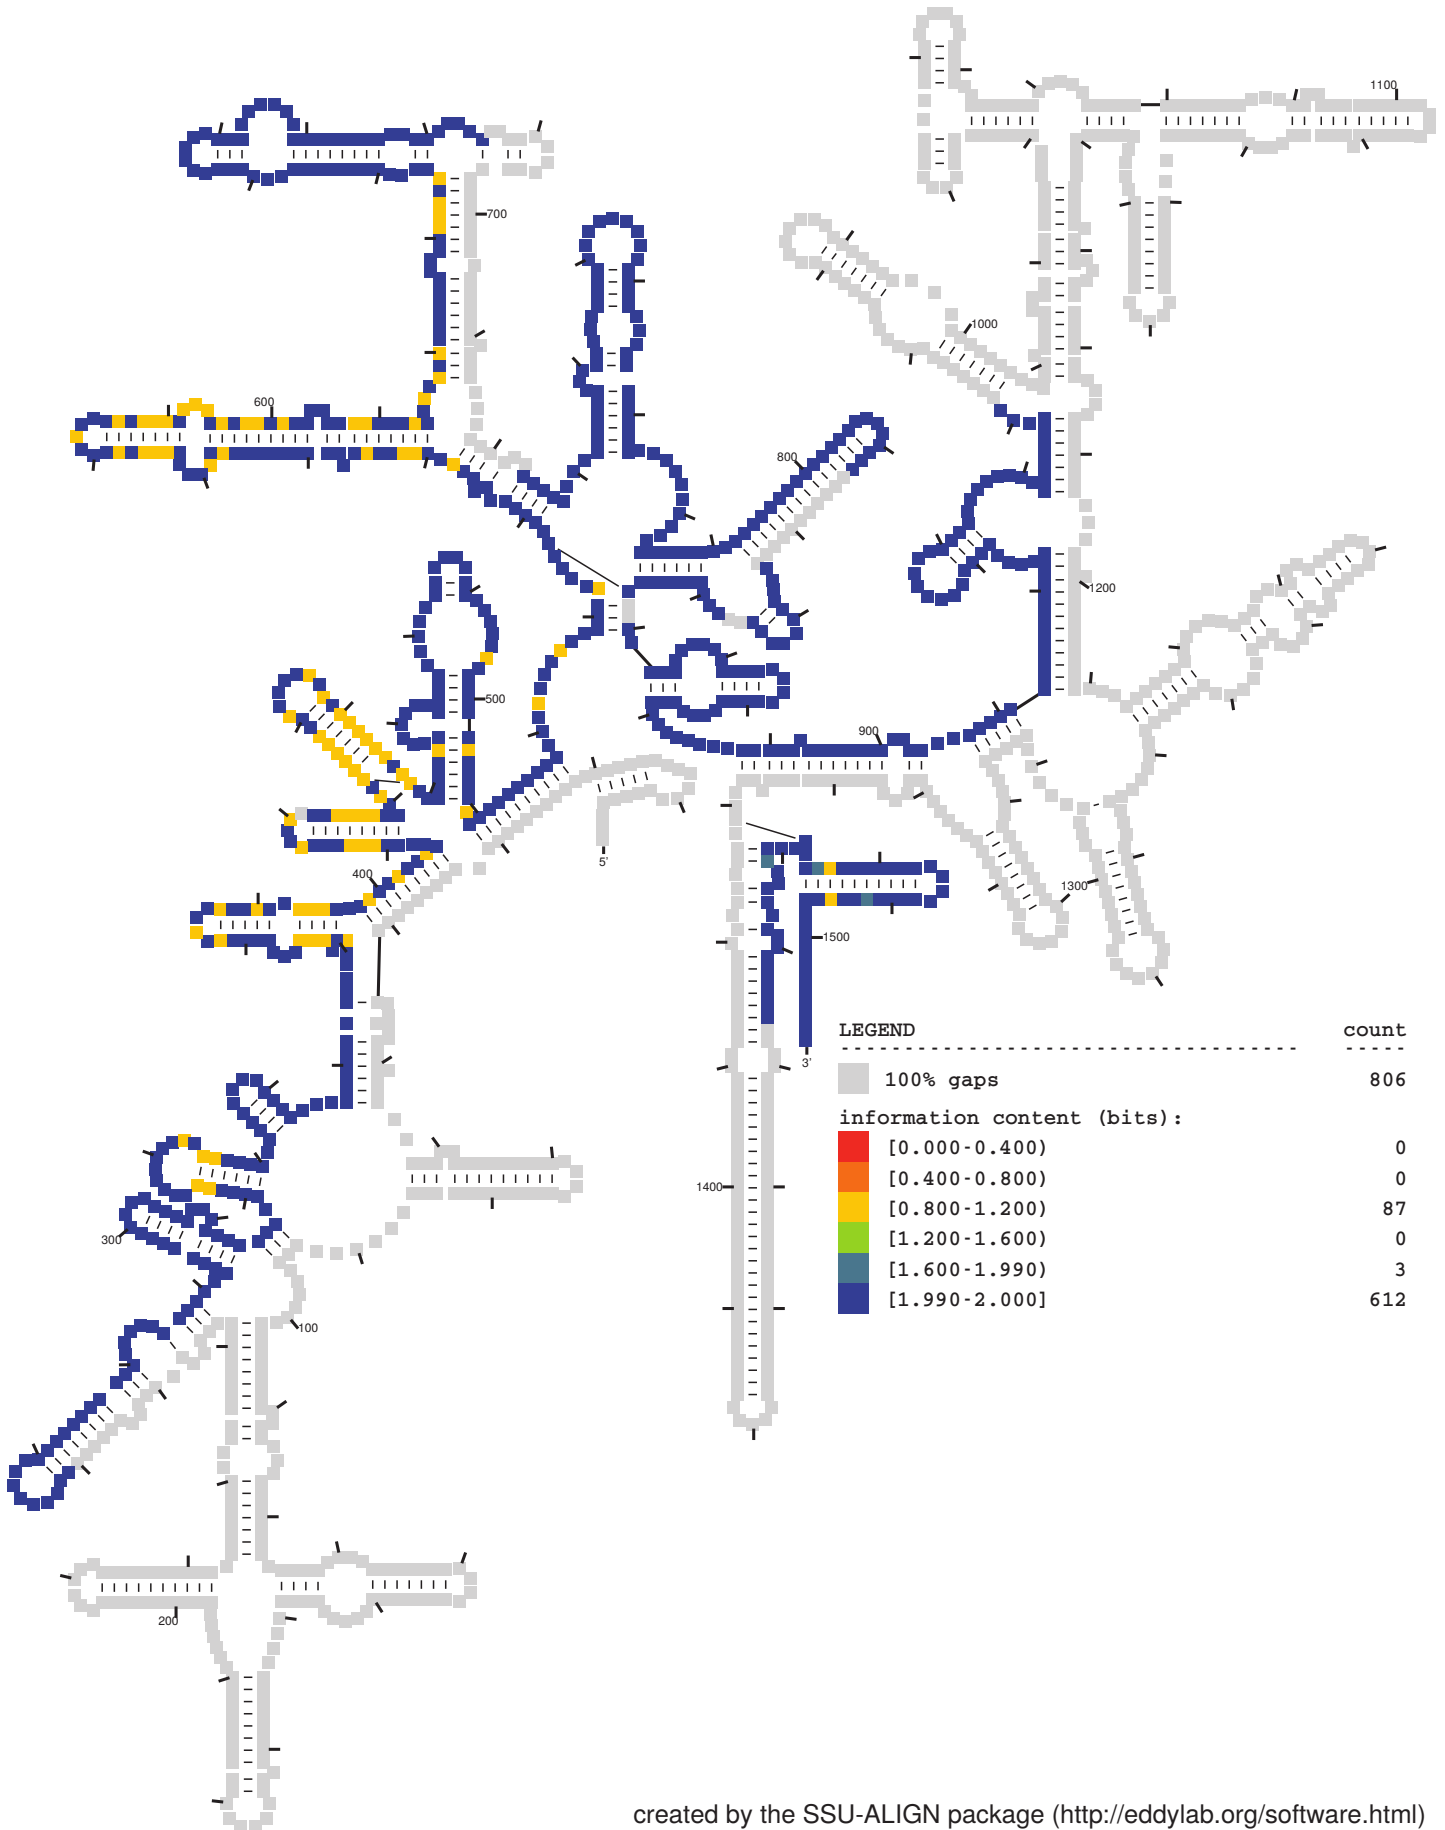

created by the SSU-ALIGN package (<http://eddylib.org/software.html>)  
structure diagram derived from CRW database (<http://www.rna.ccbb.utexas.edu/>)

| model    | #pos | #bps | #seqs | description                      |
|----------|------|------|-------|----------------------------------|
| bacteria | 1582 | 480  | 6313  | information content per position |

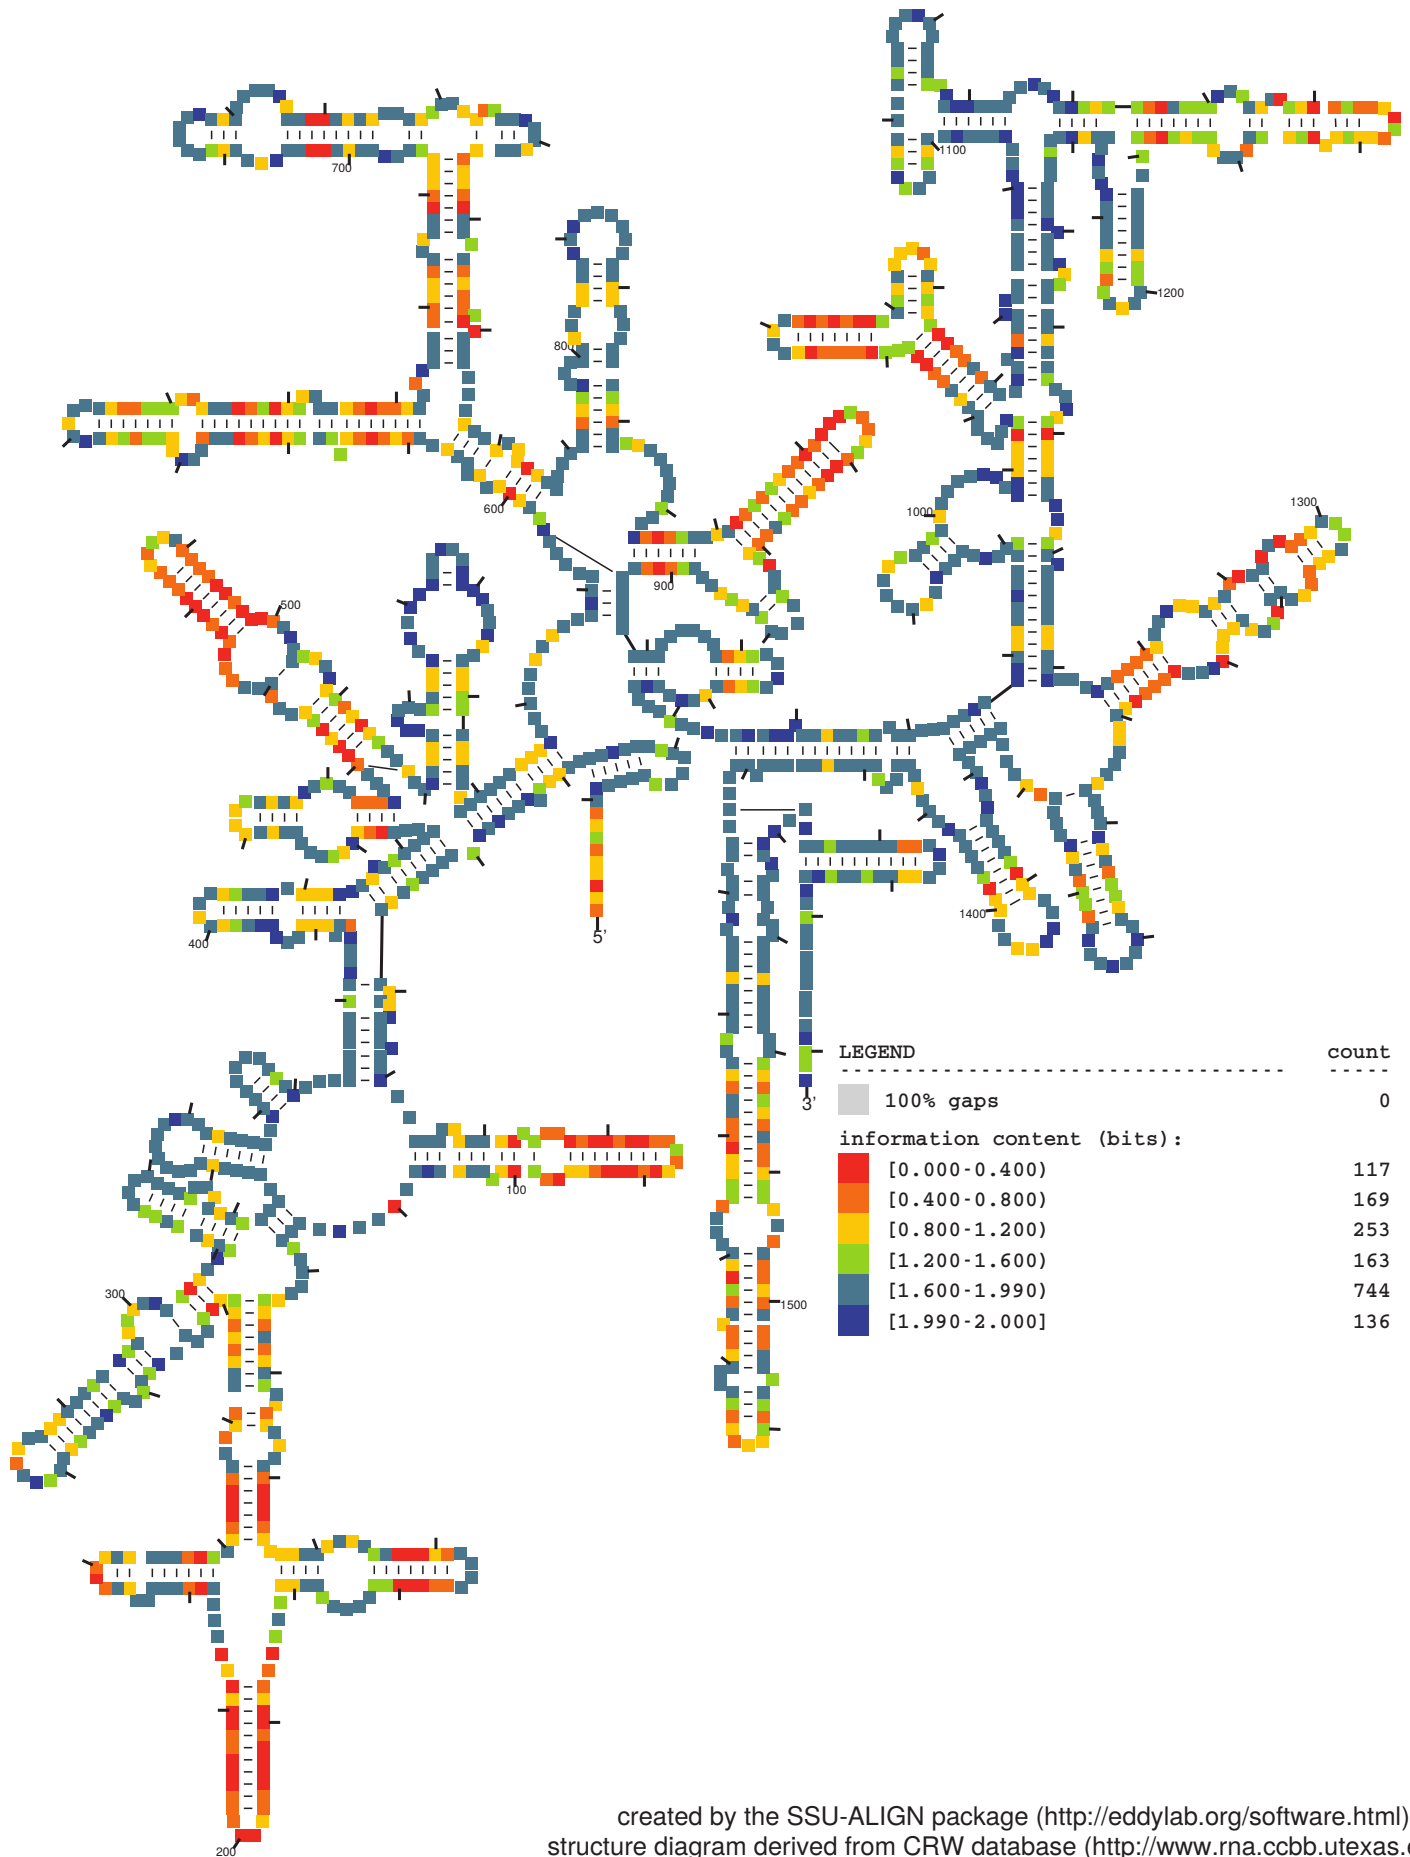

created by the SSU-ALIGN package (<http://eddylib.org/software.html>)  
structure diagram derived from CRW database (<http://www.rna.ccbb.utexas.edu/>)

| model   | #pos | #bps | #seqs | description                      |
|---------|------|------|-------|----------------------------------|
| eukarya | 1881 | 448  | 6328  | information content per position |

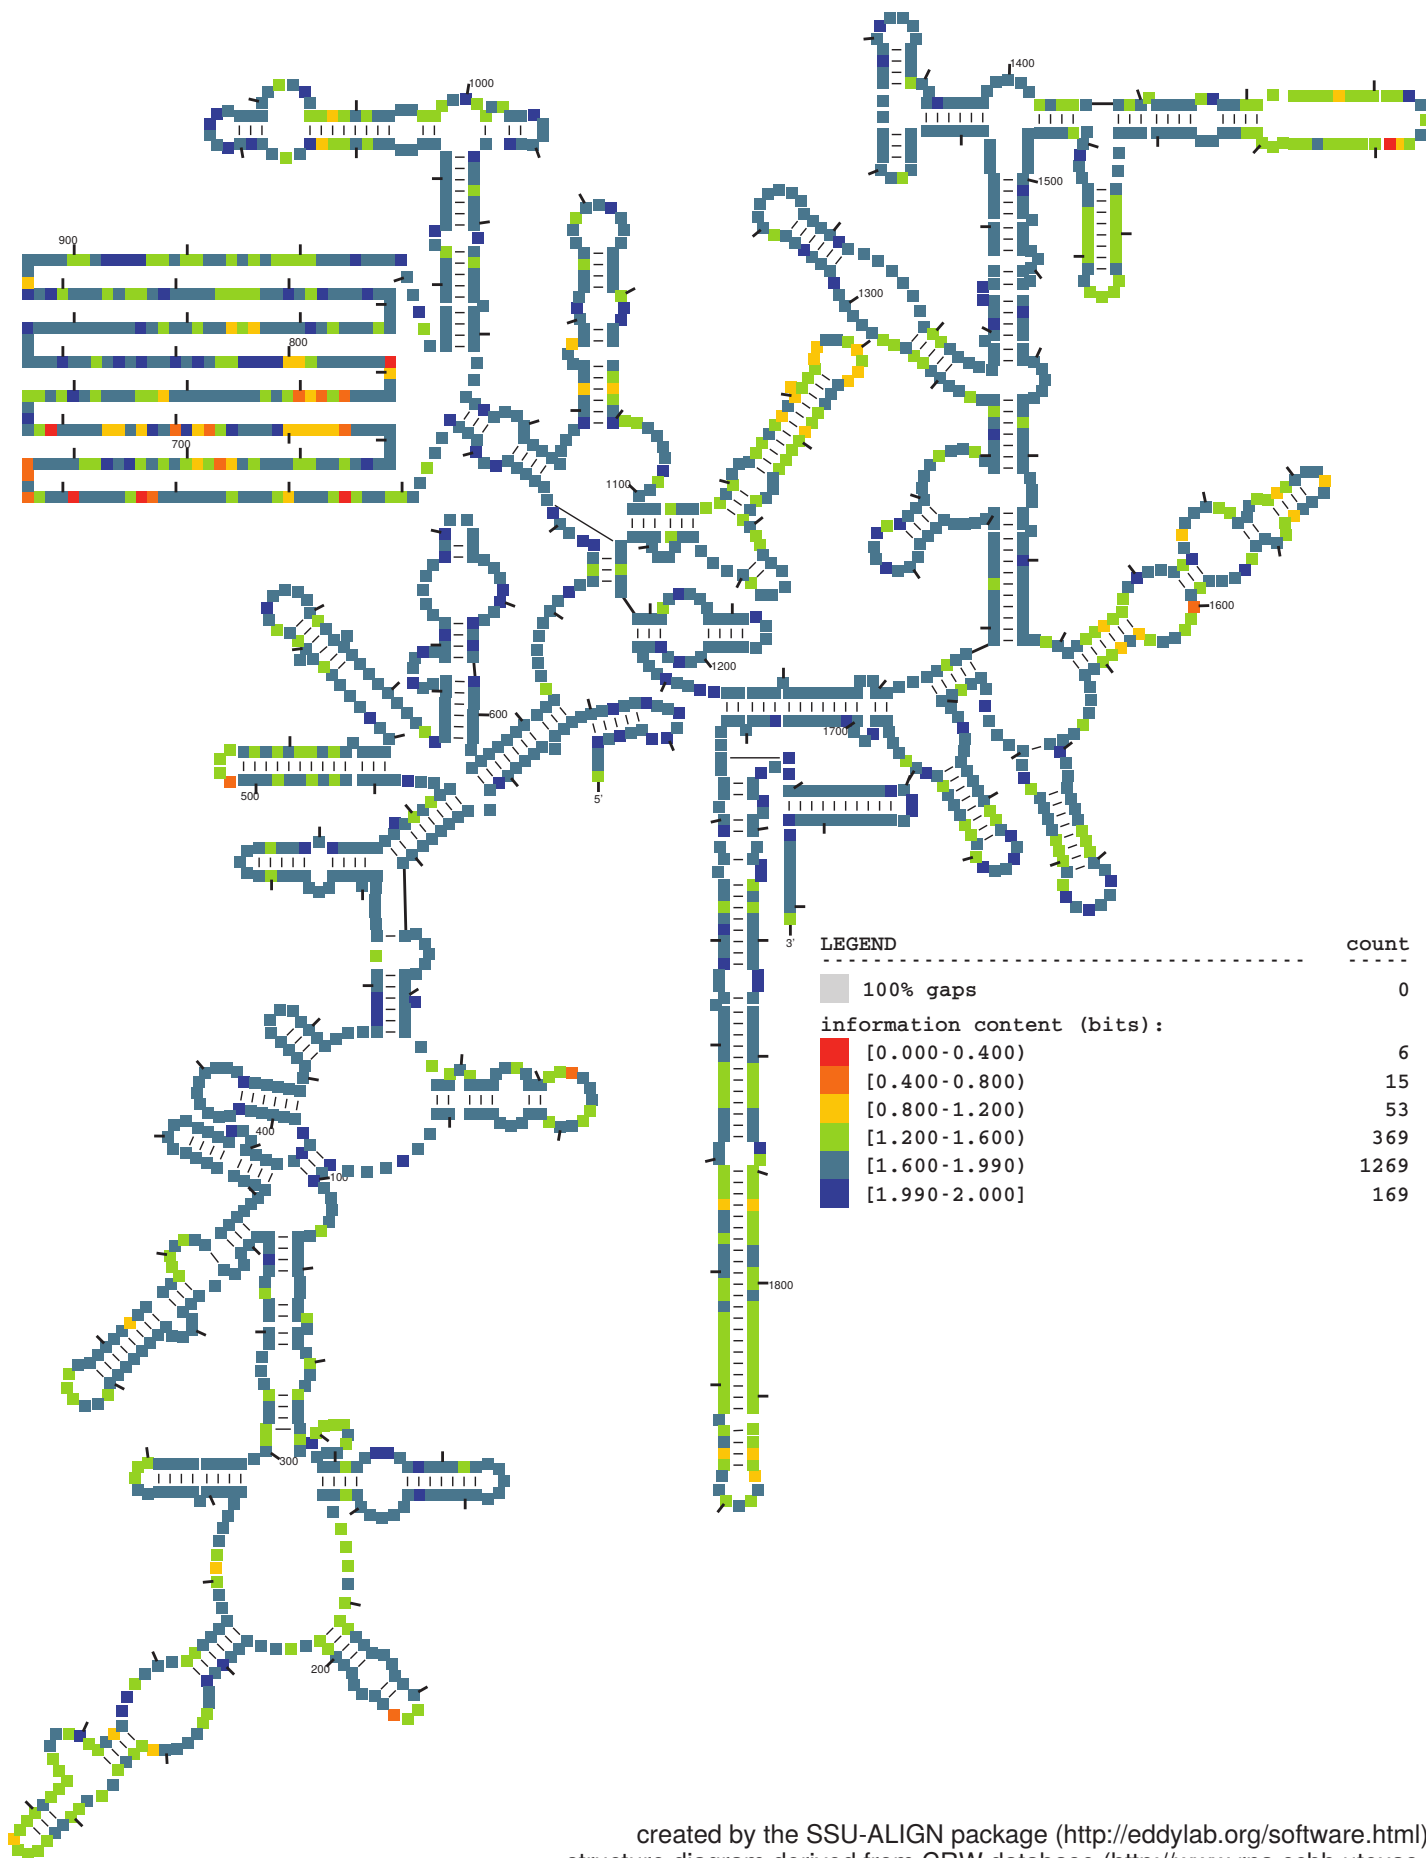

created by the SSU-ALIGN package (<http://eddylab.org/software.html>)  
 structure diagram derived from CRW database (<http://www.rna.ccbb.utexas.edu/>)
