# Supplementary material for: The Metagenome of Utricularia gibba's Traps: Into the Microbial Input to a Carnivorous Plant
Source: PubMed Central journal article supplement (PMC4747601; doi:10.1371/journal.pone.0148979), 2016-02-09

Color Key

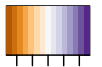

-2 0 2  
Row Z-Score

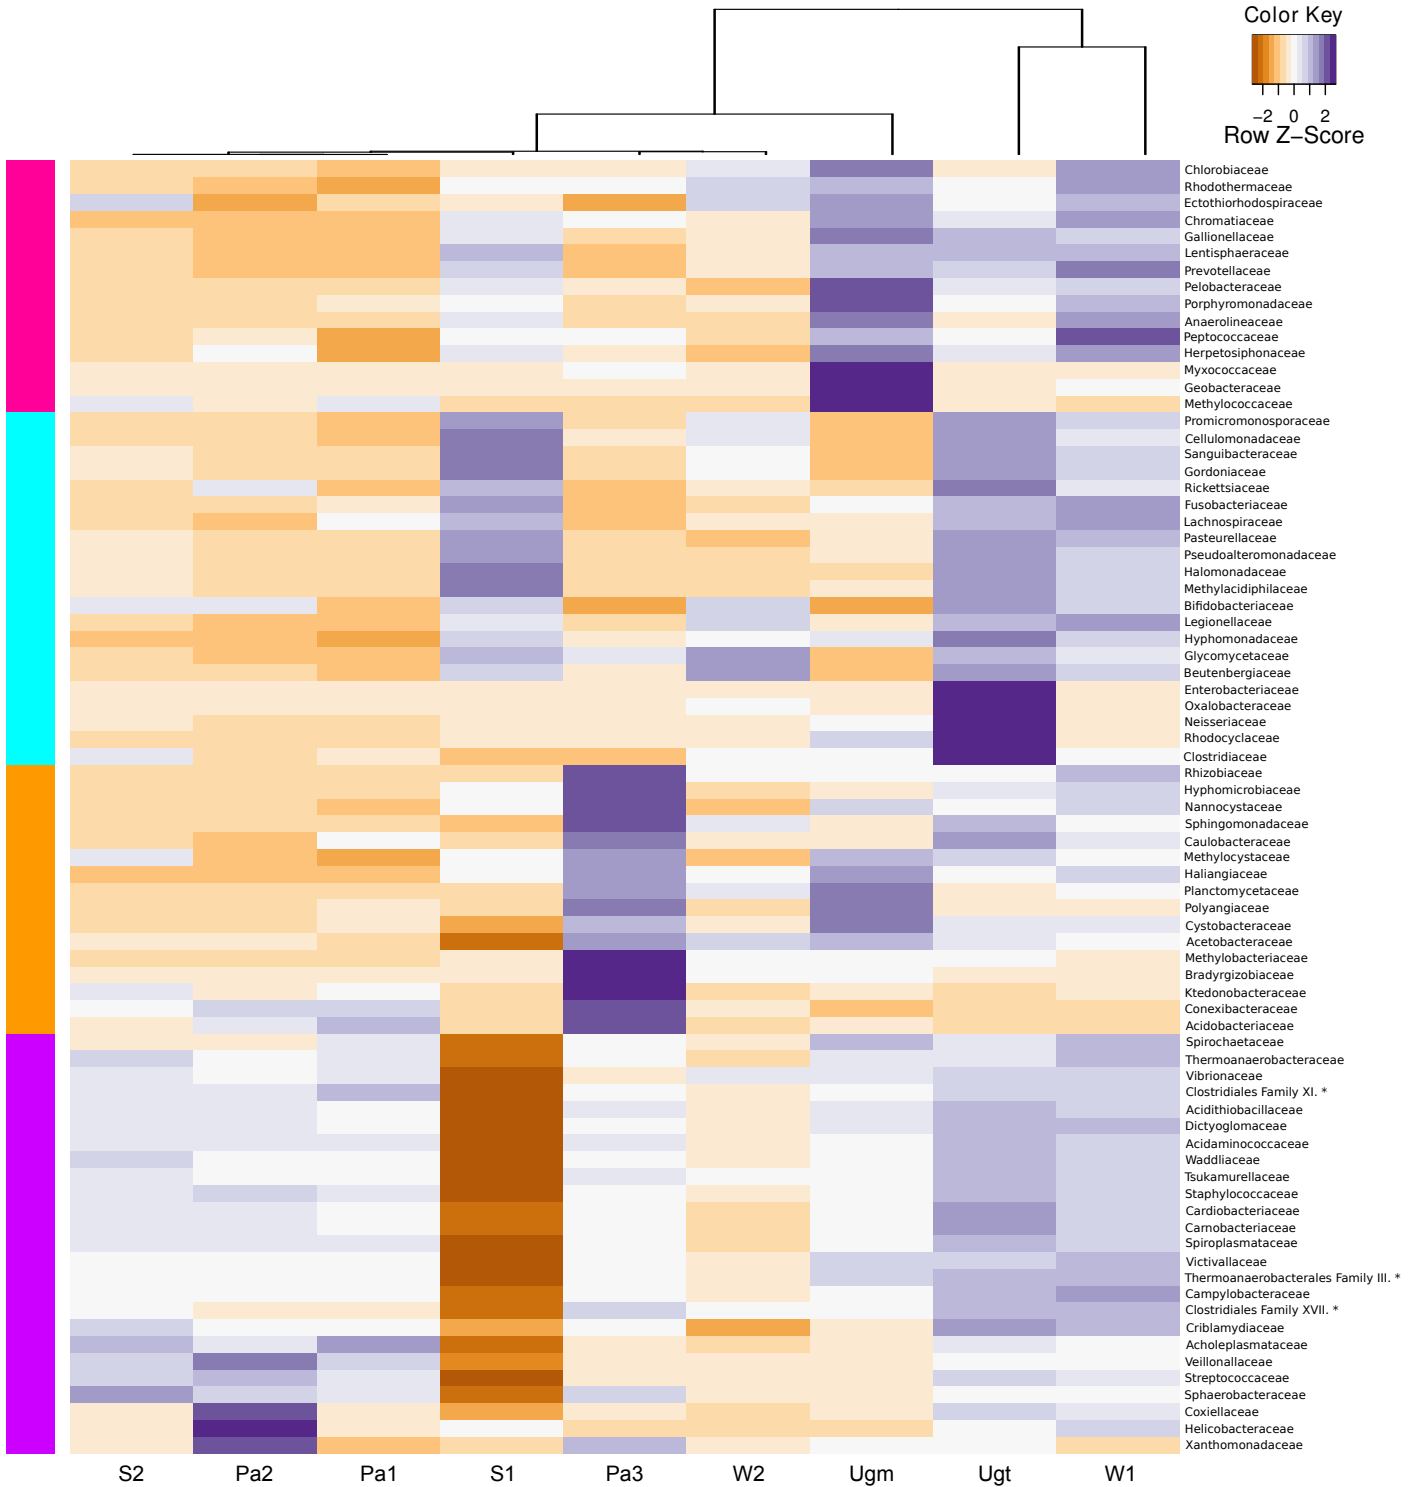

Supplement: pone.0148979.s004.pdf [file pone.0148979.s004.pdf]
