# Supplementary material for: The Metagenome of Utricularia gibba's Traps: Into the Microbial Input to a Carnivorous Plant
Source: PLoS One. 2016 Feb 9;11(2):e0148979. doi: 10.1371/journal.pone.0148979 (PMC4747601; doi:10.1371/journal.pone.0148979)
Supplement: S2 Table — It shows the reference pan-genome, its query length, coverage, and average identity of the overall alignment. (XLS) [file pone.0148979.s007.xls]

## Sheet: Ugt_recruitment
Pan-genome	query_length	Pan-genome_length	Coverage	%ID average
Pseudomonas monteilii	15031021	5112273	2.94018	92.0389
Enterobacter asburiae	12178923	4402846	2.76615	93.7372
Pseudomonas ND6	14824030	5633352	2.63148	92.1672
Pseudomonas entomophila	10678208	5204502	2.05173	90.2061
Pseudomonas VLB120	9934635	5166432	1.92292	91.5271
Pseudomonas brassicacearum	9885686	6014859	1.64354	90.1127
Pseudomonas poae	7713397	4841427	1.59321	89.606
Klebsiella variicola	7517654	4798533	1.56666	95.4653
Dechloromonas aromatica	6233555	4085901	1.52563	89.672
Pseudomonas TKP	8601314	6161373	1.39601	89.9809
Pseudomonas putida	33144862	26432418	1.25395	93.1761
Enterobacter 638	4732988	4080663	1.15986	90.3746
Klebsiella pneumoniae	8752351	8033544	1.08948	94.1986
Pseudomonas fluorescens	29441498	27131664	1.08513	92.8043
Enterobacter R4	4654137	4479081	1.03908	90.3995
Enterobacteriaceae bacterium	3923011	4185285	0.937334	90.075
Pseudomonas fulva	3975208	4357742	0.912217	88
Citrobacter koseri	3859766	4285233	0.900713	90.25
Enterobacter cloacae	16122421	18006339	0.895375	91.8897
Pseudomonas denitrificans	4320633	4945980	0.873565	87.5506
Enterobacter aerogenes	4463016	5370864	0.830968	91.0167
Citrobacter rodentium	3689748	4463952	0.826565	90.1127
Klebsiella oxytoca	4756175	5832189	0.815504	90.853
Raoultella ornithinolytica	3755043	4693509	0.80005	90.2782
Pseudomonas resinovorans	4487212	5660481	0.792726	87.841
Herbaspirillum seropedicae	3782222	4865637	0.777333	90.066
Shigella dysenteriae	2788839	3613698	0.771741	90.6517
Shigella boydii	2879499	3813927	0.754996	90.4664
Shigella flexneri	2976849	3995067	0.745131	90.6309
Rubrivivax gelatinosus	3354080	4664010	0.719141	87.5213
Leptothrix cholodnii	3224063	4485078	0.718842	87.4583
Shigella sonnei	2959427	4157268	0.711868	90.5936
Cronobacter turicensis	2878116	4049595	0.710717	89.8158
Cronobacter sakazakii	3349342	5026551	0.66633	90.4575
Methylibium petroleiphilum	2727789	4130253	0.660441	87.4679
Escherichia fergusonii	2694754	4112133	0.655318	90.7115
Ramlibacter tataouinensis	2450752	3759351	0.651908	87.0873
Dechlorosoma suillum	2198327	3421987	0.642412	88.4886
Salmonella typhimurium	2710756	4276224	0.633913	90.537
Clostridium saccharoperbutylacetonicum	2874449	5478732	0.524656	95.4183
Salmonella bongori	2255675	4299866	0.524592	90.61
Acidovorax ebreus	1758495	3379734	0.520306	87.0153
Asticcacaulis excentricus	1783886	3748472	0.475897	91.9906
Pseudomonas mendocina	3726938	7933947	0.469746	87.709
Acidovorax JS42	1788377	3864186	0.462808	86.9819
Azotobacter vinelandii	2047920	4478742	0.457253	86.8941
Azoarcus BH72	1816884	3981033	0.456385	86.7201
Alicycliphilus denitrificans	2328817	5214156	0.446634	87.5732
Pseudomonas aeruginosa	4209140	9458254	0.445023	88.1937
Acidovorax citrulli	2031863	4633038	0.43856	87.0952
Thauera MZ1T	1745492	3984416	0.43808	86.9811
Escherichia blattae	1506501	3625659	0.415511	89.8505
Acidovorax avenae	1998041	4921526	0.40598	87.0646
Delftia acidovorans	2256324	5993472	0.376464	87.2489
Pseudogulbenkiania NH8B	1380142	3740850	0.368938	86.3979
Plautia stali	1217918	3315018	0.367394	89.1717
Rahnella Y9602	1767332	4849422	0.364442	94.202
Delftia Cs1	2150674	5948113	0.361572	86.9885
Salmonella enterica	3503096	9780649	0.358166	91.8075
Acidovorax KKS102	1625953	4583382	0.35475	87.001
Pseudomonas syringae	4268026	12402408	0.344129	88.8514
Chromobacterium violaceum	1425702	4186275	0.340566	86.4371
Cupriavidus taiwanensis	1691832	5599212	0.302155	86.3661
Comamonas testosteroni	1393594	4667736	0.298559	87.9835
Novosphingobium aromaticivorans	1141013	3865529	0.295176	88.7658
Escherichia coli	3956218	13406449	0.295098	91.6625
Serratia odorifera	1360768	4662093	0.291879	88.5649
Rahnella aquatilis	1748512	6003457	0.291251	92.067
Aeromonas hydrophila	1341877	4701402	0.285421	93.0887
Serratia AS13	1316729	4732518	0.27823	88.5659
Serratia AS12	1316729	4733595	0.278167	88.5659
Serratia liquefaciens	1220517	4550694	0.268205	88.6921
Bordetella pertussis	844169	3188606	0.264745	86.0938
Polaromonas naphthalenivorans	1217181	4661778	0.261098	86.1754
Serratia proteamaculans	1220826	4740714	0.257519	88.5723
Serratia plymuthica	1341029	5287449	0.253625	88.6052
Pantoea vagans	1049307	4196697	0.250032	88.6637
Erwinia billingiae	1160187	4684611	0.247659	88.4573
Pantoea At	1335062	5465981	0.244249	89.1385
Laribacter hongkongensis	650910	2734695	0.238019	86.1303
Aeromonas veronii	918402	3896061	0.235726	90.5011
Erwinia Ejp617	765653	3274125	0.23385	89.1773
Erwinia pyrifoliae	799545	3437040	0.232626	89.2783
Serratia marcescens	1929100	8421129	0.229079	89.1386
Cupriavidus necator	1637040	7178046	0.228062	86.2971
Azoarcus KH32C	1201534	5291316	0.227077	86.7915
Erwinia tasmaniensis	779327	3437121	0.226738	89.1363
Erwinia amylovora	761156	3396721	0.224086	89.1149
Verminephrobacter eiseniae	1042034	4860045	0.214408	86.8786
Pseudomonas stutzeri	2889387	13948735	0.207143	88.1873
Edwardsiella tarda	743490	3607128	0.206117	88.9469
Aeromonas salmonicida	819024	4008668	0.204313	89.9932
Clostridium beijerinckii	940042	4707297	0.199699	89.8318
Dickeya zeae	788612	4018661	0.196238	89.3881
Collimonas fungivorans	890554	4561176	0.195247	86.3997
Polaromonas JS666	988677	5117211	0.193206	86.3039
Clostridium saccharobutylicum	758322	3931506	0.192883	89.4985
Bordetella parapertussis	904339	4918434	0.183867	86.063
Bordetella bronchiseptica	938033	5195898	0.180533	86.0837
Edwardsiella ictaluri	545033	3104472	0.175564	89.1497
Thiomonas intermedia	531305	3042876	0.174606	86.1771
Pseudoxanthomonas suwonensis	527208	3043899	0.173202	85.9301
Aromatoleum aromaticum	706651	4089333	0.172803	86.1606
Pantoea ananatis	845395	4955130	0.17061	89.5708
Thiomonas 3As	561829	3319749	0.169238	86.2368
Pectobacterium SCC3193	721822	4374783	0.164996	89.5952
Pectobacterium wasabiae	689744	4252326	0.162204	89.504
Pectobacterium atrosepticum	700569	4333715	0.161656	89.2088
Thiobacillus denitrificans	430816	2690022	0.160153	85.942
Variovorax paradoxus	2039510	12734952	0.160151	86.7958
Cupriavidus metallidurans	944668	5969901	0.158238	86.7208
Bordetella petrii	735630	4683948	0.157053	85.8036
Burkholderia gladioli	1170755	7537812	0.155318	86.1098
Candidatus Accumulibacter phosphatis	682177	4475013	0.152441	87.8363
Burkholderia glumae	852469	5655042	0.150745	86.038
Caulobacter crescentus	520669	3710337	0.140329	87.7465
Novosphingobium PP1Y	639595	4565937	0.14008	87.0694
Morganella morganii	458417	3281367	0.139703	87.8812
Pectobacterium carotovorum	806624	5794548	0.139204	89.3819
Ralstonia solanacearum	1444565	10421472	0.138614	86.2757
Sphingobium japonicum	531256	3945969	0.134633	86.8491
Sphingomonas MM	537190	4010688	0.13394	87.3203
Burkholderia multivorans	798248	6027479	0.132435	87.8661
Pseudoxanthomonas spadix	396517	3009531	0.131754	85.8529
Sideroxydans lithotrophicus	357346	2747886	0.130044	86.0764
Ralstonia eutropha	1524816	12192998	0.125057	86.482
Sodalis glossinidius	264047	2111775	0.125036	88.779
Caulobacter segnis	501340	4032411	0.124328	87.232
Burkholderia KJ006	664147	5526819	0.120168	85.7769
Pandoraea pnomenusa	553859	4630950	0.119599	86.346
Ralstonia pickettii	1491296	12506541	0.119241	86.5451
Erythrobacter litoralis	325783	2784804	0.116986	86.6442
Sphingobium chlorophenolicum	457586	4025931	0.11366	86.6268
Pandoraea RB	516149	4582023	0.112647	86.0382
Burkholderia vietnamiensis	748070	6912736	0.108216	86.7738
Thioalkalivibrio sulfidophilus	323975	3010593	0.107612	86.1991
Burkholderia cepacia	599190	5570565	0.107564	85.7912
Starkeya novella	421430	4205505	0.100209	86.0254
Sphingopyxis alaskensis	300461	3034677	0.0990092	86.2298
Burkholderia mallei	514731	5267850	0.0977118	86.2912
Rhodospirillum photometricum	314178	3215701	0.0977012	88.9786
Sphingomonas wittichii	520292	5345967	0.0973242	86.3897
Yersinia enterocolitica	443891	4600112	0.0964957	89.3035
Dickeya dadantii	1125064	11718530	0.0960073	90.3719
Rhodanobacter 2APBS1	356926	3730257	0.095684	85.7039
Sphingobium SYK	362489	3859698	0.0939164	86.2667
Yersinia pestis	400363	4312887	0.0928295	89.5001
Achromobacter xylosoxidans	1146295	12401472	0.0924322	86.3183
Azospirillum lipoferum	545022	5911911	0.0921905	86.4488
Rhodoferax ferrireducens	404966	4409424	0.091841	85.8869
Bordetella avium	297212	3285650	0.0904576	86.0341
Brevundimonas subvibrioides	268373	3133740	0.0856398	86.3274
Burkholderia ambifaria	638732	7719627	0.0827413	85.8327
Burkholderia 383	622660	7541754	0.0825617	85.8616
Azospirillum B510	526726	6383880	0.0825088	86.2302
Caulobacter K31	419097	5107995	0.0820473	86.4218
Halomonas elongata	282507	3506337	0.0805704	85.5302
Yersinia pseudotuberculosis	394372	4947109	0.0797177	89.5738
Magnetospirillum magneticum	342751	4313163	0.0794663	85.8852
Serratia ATCC	336796	4241790	0.0793995	89.774
Methylobacterium populi	389238	4934588	0.0788795	86.7136
Xenorhabdus bovienii	266681	3419160	0.0779961	89.0946
Polymorphum gilvum	317659	4125498	0.0769989	85.819
Rhodospirillum centenum	285784	3765984	0.0758856	85.6826
Burkholderia CCGE1001	441304	5890195	0.0749218	85.7795
Oceanimonas GK1	231834	3094857	0.0749094	85.7973
Burkholderia cenocepacia	670771	8955671	0.074899	85.778
Bradyrhizobium ORS	475006	6354795	0.0747477	86.1435
Magnetospirillum gryphiswaldense	292946	3934818	0.0744497	86.1654
Janthinobacterium Marseille	272920	3666477	0.0744366	88.4353
Xenorhabdus nematophila	266592	3593373	0.0741899	89.3179
Phenylobacterium zucineum	284765	3846912	0.0740243	85.9975
Thioalkalivibrio K90mix	194007	2634807	0.0736323	85.8624
Xanthobacter autotrophicus	352459	4825341	0.0730433	86.4166
Xanthomonas citri	332716	4559988	0.0729642	85.6654
Stenotrophomonas maltophilia	557196	7664252	0.0727006	87.4637
Xanthomonas fuscans	297246	4090233	0.0726721	85.9968
Herminiimonas arsenicoxydans	215758	3001131	0.0718922	86.2528
Agromonas oligotrophica	497012	7074639	0.0702526	86.1854
Bradyrhizobium S23321	443144	6333906	0.0699638	86.802
Allochromatium vinosum	229042	3286500	0.0696918	85.4095
Methylobacillus flagellatus	177614	2549745	0.0696595	88.9557
Azospirillum brasilense	453662	6525774	0.0695185	86.2516
Oligotropha carboxidovorans	238422	3465258	0.0688035	86.0326
Burkholderia phenoliruptrix	424122	6379599	0.066481	86.0785
Mesorhizobium australicum	347570	5357340	0.0648773	86.0711
Burkholderia thailandensis	481775	7445892	0.0647035	85.9733
Burkholderia CCGE1002	421335	6550268	0.0643233	85.699
Bradyrhizobium BTAi1	461384	7197549	0.0641029	86.3587
Burkholderia CCGE1003	384039	6003699	0.0639671	85.8686
Azorhizobium caulinodans	304759	4813410	0.0633146	86.2506
Methylobacterium chloromethanicum	318816	5067917	0.0629087	85.9707
Nitrobacter hamburgensis	236947	3812637	0.0621478	85.922
Aster yellows	30253	491769	0.0615187	89.9317
Mesorhizobium ciceri	351139	5774796	0.0608054	85.9812
Taylorella asinigenitalis	98362	1618089	0.060789	93.3965
Haemophilus parainfluenzae	112568	1857732	0.0605943	93.3382
Chromohalobacter salexigens	199833	3300135	0.060553	85.5994
Ferrimonas balearica	229713	3801900	0.0604206	85.6006
Acidiphilium cryptum	203619	3418986	0.0595554	86.1121
Xanthomonas axonopodis	310568	5251614	0.0591376	85.6597
Acidiphilium multivorum	213513	3644550	0.0585842	85.9729
Xanthomonas oryzae	271422	4636230	0.0585437	86.1206
Mesorhizobium loti	377791	6483141	0.0582728	86.0315
Mesorhizobium opportunistum	341373	5901561	0.0578445	86.0469
Rhizobium NGR234	333907	5773695	0.0578325	85.9964
Paracoccus denitrificans	267571	4629837	0.0577927	85.5232
Burkholderia YI23	436668	7613115	0.0573573	86.8847
Burkholderia RPE64	340066	5934636	0.0573019	85.7116
Methylobacterium radiotolerans	332439	5816710	0.0571524	86.0658
Flavobacterium johnsoniae	297954	5295453	0.056266	90.2579
Burkholderia pseudomallei	511667	9171252	0.0557903	86.0641
Methylovorus MP688	143215	2568444	0.0557594	87.4819
Acinetobacter baumannii	340527	6218052	0.0547643	92.5461
Marinobacter aquaeolei	224713	4112559	0.0546407	90.1526
Burkholderia xenovorans	445863	8231991	0.0541622	86.2188
Frateuria aurantia	166829	3108164	0.0536745	86.0637
Sulfuricella denitrificans	155547	2899869	0.0536393	85.2942
Methylovorus glucosetrophus	149083	2805201	0.0531452	87.3464
Methylobacterium 4	326411	6175452	0.0528562	85.724
Burkholderia phytofirmans	364937	6952095	0.0524931	85.5612
Nitrobacter winogradskyi	140617	2742819	0.0512673	86.2828
Rhodobacter capsulatus	178066	3474144	0.0512546	85.9316
Providencia stuartii	181627	3599502	0.0504589	89.4255
Burkholderia phymatum	363138	7228427	0.0502375	85.732
Emticicia oligotrophica	229597	4607736	0.0498286	89.3277
Photorhabdus asymbiotica	202432	4065430	0.0497935	89.237
Methylocystis SC2	163408	3331410	0.0490507	86.9606
Methylocella silvestris	178615	3665544	0.0487281	85.4129
Rhodospirillum rubrum	190248	3912573	0.0486248	85.6337
Alkalilimnicola ehrlichii	140630	2936853	0.0478846	85.3249
Rhizobium IRBG74	232383	4871064	0.0477068	86.2418
Thioflavicoccus mobilis	161402	3396238	0.0475238	85.4306
Alcanivorax dieselolei	204416	4374693	0.0467269	85.758
Tistrella mobilis	269774	5788194	0.0466076	86.27
Hyphomicrobium nitrativorans	138700	3021966	0.0458973	86.0929
Photorhabdus luminescens	199601	4390665	0.0454603	89.0992
Xanthomonas albilineans	149551	3323748	0.0449947	85.7657
Methylobacterium extorquens	312635	7018134	0.0445467	86.1586
Methylobacterium nodulans	295056	6655062	0.0443356	85.7605
Tolumonas auensis	135029	3065001	0.0440551	86.4515
Agrobacterium fabrum	216812	4987824	0.0434683	86.0698
Proteus mirabilis	161400	3718892	0.0434	88.511
Methylococcus capsulatus	125885	2918073	0.0431398	85.4144
Shewanella putrefaciens	191729	4453565	0.0430507	95.4629
Agrobacterium radiobacter	268961	6321999	0.0425437	85.8952
Rhizobium tropici	241397	5717874	0.042218	86.1792
Methylotenera mobilis	96059	2278983	0.0421499	87.1857
Ruegeria pomeroyi	172821	4126446	0.0418813	85.4398
Heliobacterium modesticaldum	105019	2518032	0.0417068	87.1588
Parvibaculum lavamentivorans	142924	3469653	0.0411926	85.6243
Brucella ceti	103987	2574879	0.0403852	86.1102
Maricaulis maris	121874	3027633	0.0402539	85.253
Xanthomonas campestris	360533	9028203	0.0399341	87.2862
Bradyrhizobium japonicum	467071	11721279	0.0398481	87.0234
Gluconacetobacter diazotrophicus	153101	3870958	0.0395512	85.5493
Pelagibacterium halotolerans	137208	3500208	0.0392	85.3503
Haemophilus influenzae	108585	2823640	0.0384557	93.649
Brucella ovis	97488	2562144	0.0380494	86.1017
Shewanella ANA	169150	4474581	0.0378024	92.0854
Sinorhizobium fredii	340317	9020451	0.0377273	86.1313
Halorhodospira halophila	91471	2448792	0.0373535	85.8472
Thioalkalivibrio nitratireducens	121715	3260977	0.0373247	85.2215
Agrobacterium H13	180689	4938447	0.0365882	85.7278
Brucella microti	103023	2880237	0.0357689	86.0587
Leisingera methylohalidivorans	138767	3911874	0.0354733	85.656
Halothiobacillus neapolitanus	80670	2278776	0.0354006	89.0273
Brucella suis	102541	2925063	0.035056	86.0288
Helicobacter felis	53670	1531627	0.0350412	89.0472
Brucella pinnipedialis	99030	2847954	0.0347723	85.9682
Brucella abortus	101406	2937096	0.0345259	86.0317
Brucella canis	101758	2954007	0.0344474	86.1578
Marinobacter hydrocarbonoclasticus	126419	3673707	0.0344118	85.552
Acinetobacter calcoaceticus	113686	3366960	0.0337652	89.5413
Rhodobacter sphaeroides	261772	7910745	0.0330907	86.0705
Brucella melitensis	99331	3074559	0.0323074	86.2002
Burkholderia rhizoxinica	104503	3283629	0.0318255	85.3926
Pusillimonas T7	110671	3552993	0.0311487	86.0213
Ochrobactrum anthropi	139480	4479292	0.0311388	86.0231
Sinorhizobium meliloti	261844	8430495	0.0310591	86.2192
Acinetobacter oleivorans	109438	3610107	0.0303143	89.6186
Rhodomicrobium vannielii	99122	3304248	0.0299984	85.5557
Sinorhizobium medicae	167072	5730932	0.0291527	86.6534
Rhizobium etli	279963	9754299	0.0287015	86.2267
Hyphomicrobium MC1	121206	4226400	0.0286783	85.5132
Isoptericola variabilis	83968	2967297	0.0282978	86.5769
Nocardioides JS614	134986	4771848	0.028288	86.5006
Vibrio alginolyticus	124318	4402374	0.0282389	92.955
Hyphomonas neptunium	94038	3341064	0.0281461	85.4206
Chelativorans BNC1	121556	4372665	0.0277991	86.1304
Methylotenera 301	75127	2736342	0.0274553	86.8285
Thiocystis violascens	108261	4104051	0.0263791	85.0715
Agrobacterium vitis	140776	5341029	0.0263575	86.6986
Dinoroseobacter shibae	101323	3858330	0.0262608	85.9227
Marinobacter adhaerens	107976	4181541	0.0258221	85.506
Shewanella W3	100095	3971250	0.0252049	95.2636
Rhizobium leguminosarum	290035	11508188	0.0252025	86.0246
Anaeromyxobacter K	113531	4564068	0.024875	86.766
Granulibacter bethesdensis	60462	2476911	0.0244102	85.2338
Pelobacter propionicus	87030	3596184	0.0242007	92.7501
Nitrosomonas europaea	54887	2314302	0.0237164	89.3192
Shewanella amazonensis	89836	3788208	0.0237146	86.1699
Clostridium botulinum	279183	11818974	0.0236216	89.74
Cellvibrio gilvus	75309	3204297	0.0235025	86.4663
Strawberry lethal	12593	542739	0.0232027	88.1604
Acinetobacter ADP1	72571	3141834	0.0230983	89.4469
Intrasporangium calvum	79887	3592482	0.0222373	86.0941
Xylanimonas cellulosilytica	76082	3474324	0.0218984	86.3747
Cellulomonas fimi	83185	3827334	0.0217345	86.445
Anaeromyxobacter dehalogenans	116396	5423082	0.0214631	86.6386
Chlamydia muridarum	20771	971826	0.0213732	87.5129
Thermomonospora curvata	100229	4713408	0.0212647	85.7582
Simiduia agarivorans	82721	3894141	0.0212424	85.546
Haemophilus ducreyi	30244	1424064	0.0212378	96.0221
Geodermatophilus obscurus	94789	4470098	0.0212051	85.9178
Paracoccus aminophilus	89721	4279416	0.0209657	85.7658
Cellulomonas flavigena	77360	3700926	0.0209029	86.6578
Anaeromyxobacter Fw109	97796	4717572	0.0207302	86.7041
Micrococcus luteus	44954	2175066	0.0206679	85.9746
Sulfurihydrogenibium azorense	31218	1516575	0.0205845	88.4514
Kytococcus sedentarius	48329	2433894	0.0198567	85.411
Comamonadaceae bacterium	53004	2672400	0.0198339	84.9333
Modestobacter marinus	97980	5038674	0.0194456	86.2709
Microbacterium testaceum	69764	3644292	0.0191434	87.0563
Persephonella marina	35712	1872360	0.0190733	85.4622
Kineococcus radiotolerans	81549	4467861	0.0182524	86.6115
Thermobispora bispora	62259	3492543	0.0178263	85.7358
Alcanivorax borkumensis	48384	2729661	0.0177253	88.5978
Ketogulonicigenium vulgare	54351	3094485	0.0175638	85.1218
Sanguibacter keddieii	66973	3833301	0.0174714	85.9276
Legionella pneumophila	85967	4942818	0.0173923	92.4126
Nocardia farcinica	96848	5652774	0.0171328	85.8389
Kitasatospora setae	127593	7493553	0.017027	85.906
Spiribacter UAH	30320	1808280	0.0167673	85.797
Blastococcus saxobsidens	71482	4336599	0.0164834	86.2121
Coxiella burnetii	32493	2007291	0.0161875	88.819
Vibrio anguillarum	55686	3444204	0.016168	95.8502
Streptococcus I	32523	2012484	0.0161606	89.877
Kocuria rhizophila	36594	2385912	0.0153375	85.756
Lactobacillus crispatus	27067	1768479	0.0153052	90.1237
Hyphomicrobium denitrificans	97052	6396500	0.0151727	86.0801
Pseudonocardia dioxanivorans	97792	6462061	0.0151333	85.6776
Streptomyces collinus	100882	6673698	0.0151164	86.1048
Mycoplasma hyopneumoniae	14411	956700	0.0150632	99.6467
Streptomyces albus	88666	5902164	0.0150226	86.1248
Kribbella flavida	100292	6788841	0.0147731	85.7368
Desulfurispirillum indicum	37394	2549720	0.0146659	96.2228
Micromonospora aurantiaca	90469	6265581	0.014439	85.7393
Micromonospora L5	89759	6222119	0.0144258	85.8224
Nakamurella multipartita	72490	5078277	0.0142745	85.6544
Mycobacterium chubuense	80419	5676747	0.0141664	85.6617
Mycobacterium MCS	76577	5416359	0.0141381	86.1983
Nitrosomonas eutropha	32050	2279046	0.0140629	91.5816
Mycobacterium yongonense	71175	5061573	0.0140618	85.6133
Mycobacterium JLS	78012	5549799	0.0140567	86.0998
Vibrio furnissii	58726	4206975	0.0139592	85.1327
Saccharopolyspora erythraea	95929	6882946	0.0139372	85.6974
Rhodococcus equi	63290	4547415	0.0139178	85.7136
Rhodopseudomonas palustris	337591	24285328	0.013901	86.7218
Mycobacterium avium	72723	5267805	0.0138052	85.8969
Nocardiopsis dassonvillei	75525	5496225	0.0137412	85.1254
Rhodococcus pyridinivorans	62321	4545993	0.013709	85.1339
Ectothiorhodospiraceae bacterium	22541	1652232	0.0136428	85.796
Mycobacterium KMS	76658	5629383	0.0136175	86.1915
Mycobacterium MOTT36Y	67854	5012298	0.0135375	85.2251
Mycoplasma gallisepticum	13980	1034973	0.0135076	99.6576
Leifsonia xyli	33637	2515047	0.0133743	86.291
Geobacter M18	59846	4511559	0.013265	85.2715
Mycobacterium vanbaalenii	76685	5828292	0.0131574	86.1814
Streptomyces cattleya	95692	7292085	0.0131227	85.8973
Mycobacterium JDM601	55099	4202805	0.0131101	86.0111
Shewanella loihica	51564	3938745	0.0130915	85.1159
Mycobacterium indicus	65121	4997634	0.0130304	85.5431
Clostridium perfringens	41938	3228393	0.0129904	86.0303
Clavibacter michiganensis	56563	4373448	0.0129333	85.9819
Beutenbergia cavernae	54983	4314435	0.012744	86.5169
Streptomyces coelicolor	99872	7884895	0.0126662	86.1683
Neisseria lactamica	22775	1804704	0.0126198	87.6361
Streptomyces venezuelae	93436	7416000	0.0125992	85.869
Gluconacetobacter xylinus	36542	2942238	0.0124198	84.7353
Propionibacterium acidipropionici	39433	3180102	0.0123999	85.5787
Actinosynnema mirum	88963	7182923	0.0123853	85.7526
Geobacter bemidjiensis	49810	4033590	0.0123488	85.3025
Corynebacterium maris	30695	2507961	0.012239	85.3545
Propionibacterium freudenreichii	27082	2216619	0.0122177	85.4226
Brachybacterium faecium	39183	3215674	0.012185	86.0563
Streptosporangium roseum	105932	8841484	0.0119812	85.6267
Verrucosispora maris	70790	5915463	0.0119669	85.9176
Mycobacterium intracellulare	66082	5566983	0.0118703	85.553
Streptomyces hygroscopicus	100981	8532309	0.0118351	86.0936
Ruegeria TM1040	42919	3645699	0.0117725	85.3087
Thermobifida fusca	36126	3084381	0.0117126	85.3786
Gallionella capsiferriformans	32724	2804637	0.0116678	85.3466
Mycobacterium gilvum	68853	5920716	0.0116292	86.004
Tsukamurella paurometabola	46458	4026300	0.0115386	85.6424
Vibrio cholerae	45736	3978423	0.011496	86.3372
Propionibacterium acnes	30650	2684166	0.0114188	96.8082
Nocardia cyriacigeorgica	61295	5375238	0.0114032	85.5192
Saccharothrix espanaensis	94239	8368944	0.0112606	85.6665
Corynebacterium halotolerans	31194	2772984	0.0112493	85.054
Clostridium tetani	31014	2758593	0.0112427	90.6299
Mycobacterium VKM	53929	4883727	0.0110426	86.1915
Streptomyces griseus	81605	7414584	0.011006	86.0103
Streptomyces flavogriseus	72424	6608106	0.0109599	85.8507
Streptomyces PAMC26508	72564	6722319	0.0107945	86.0107
Streptomyces SirexAA	69331	6437431	0.01077	86.1613
Acidimicrobidae bacterium	48168	4486491	0.0107362	85.7579
Catenulispora acidiphila	99050	9271437	0.0106833	85.9516
Clostridium cellulovorans	44855	4273827	0.0104953	87.4244
Mycobacterium rhodesiae	61333	5845188	0.0104929	86.0737
Frankia EuI1c	79133	7555950	0.0104729	85.8274
Streptomyces avermitilis	81041	7829232	0.0103511	86.0548
Streptomyces fulvissimus	72147	7003092	0.0103022	85.9301
Streptococcus equi	24374	2376276	0.0102572	96.1402
Streptococcus pyogenes	26245	2564535	0.0102338	96.1397
Amycolatopsis mediterranei	94349	9220053	0.010233	86.0787
Deinococcus gobiensis	37809	3694914	0.0102327	85.0516
Nocardiopsis alba	51855	5082476	0.0102027	86.1713
Cyanobium gracile	30119	2954671	0.0101937	86.6402
Jannaschia CCS1	40572	3984351	0.0101828	85.2835
Myxococcus xanthus	83776	8272719	0.0101268	86.391
Phaeobacter gallaeciensis	61835	6158472	0.0100406	85.4679
Frankia symbiont	39721	3966965	0.0100129	86.0332
Neisseria gonorrhoeae	20141	2029551	0.00992387	84.5132
Frankia CcI3	44416	4508796	0.00985097	85.5454
Gordonia polyisoprenivorans	50582	5182839	0.00975952	85.5169
Cellvibrio japonicus	39705	4071198	0.00975266	85.6652
Amycolatopsis orientalis	78791	8093877	0.00973464	85.7425
Conexibacter woesei	57999	5969418	0.00971602	86.0409
Myxococcus fulvus	75773	7820901	0.00968853	86.2593
Symbiobacterium thermophilum	29100	3008181	0.00967362	84.7917
Actinoplanes N902	80245	8295825	0.00967294	86.0962
Desulfarculus baarsii	31663	3290154	0.00962356	84.4219
Geobacter M21	39132	4089429	0.00956906	84.9343
Haliangium ochraceum	76910	8040639	0.00956516	85.477
Streptomyces scabiei	81364	8708610	0.00934294	86.0886
Oscillatoria PCC	57912	6229584	0.00929629	90.9301
Streptomyces davawensis	78697	8521191	0.00923545	86.0403
Beijerinckia indica	32979	3614235	0.00912475	85.5294
Gordonia KTR9	47631	5241486	0.00908731	85.2481
Pasteurella multocida	22493	2499069	0.00900055	96.2117
Desulfovibrio aespoeensis	28519	3189270	0.00894217	85.3479
Propionibacterium avidum	19710	2207226	0.00892976	86.9949
Gordonia bronchialis	39654	4478220	0.00885486	85.6437
Desulfomicrobium baculatum	31052	3518268	0.00882593	85.319
Corynebacterium variabile	25637	2920179	0.00877926	85.3052
Corallococcus coralloides	80264	9222303	0.00870325	85.4294
Acidithiobacillus caldus	22794	2643087	0.00862401	85.1813
Microlunatus phosphovorus	43772	5105058	0.00857424	85.5593
Deinococcus radiodurans	24725	2915222	0.00848134	84.8458
Frankia alni	54852	6478494	0.00846678	86.0868
Stackebrandtia nassauensis	52426	6222591	0.00842511	85.2756
Idiomarina loihiensis	21918	2608020	0.00840408	94.0328
Shewanella frigidimarina	33890	4035504	0.00839796	95.8817
Streptomyces bingchenggensis	86292	10285431	0.00838973	86.0312
Streptomyces violaceusniger	78584	9450999	0.00831489	86.0269
Teredinibacter turnerae	37112	4463835	0.00831393	86.5153
Desulfovibrio alaskensis	26279	3172828	0.00828252	90.7582
Shewanella MR	36464	4406673	0.00827472	87.2909
Eggerthella lenta	25656	3127671	0.00820291	84.665
Clostridium acetobutylicum	29101	3588552	0.0081094	87.3967
Streptomyces rapamycinicus	83930	10350237	0.00810899	85.7216
Segniliparus rotundus	23031	2841027	0.00810658	85.5734
Gemmatimonas aurantiaca	34315	4268871	0.00803843	86.9064
Actinoplanes missouriensis	63570	7926330	0.00802011	85.6892
Frankia EAN1pec	58448	7330446	0.00797332	86.0818
Marinobacter BSs20148	28157	3548307	0.00793533	84.9426
Geobacter lovleyi	28516	3603375	0.00791369	85.8189
Desulfotalea psychrophila	24374	3095025	0.00787522	96.1402
Actinoplanes SE50	63321	8126247	0.00779216	85.8715
Actinoplanes friuliensis	64505	8426865	0.00765469	86.17
Clostridium pasteurianum	29044	3798006	0.00764717	86.9145
Desulfobulbus propionicus	25647	3374414	0.00760043	85.5834
Oceanithermus profundus	16912	2256627	0.00749437	86.0141
Thermaerobacter marianensis	17824	2395983	0.00743912	84.847
Corynebacterium terpenotabidum	18068	2431278	0.00743148	85.4065
Myxococcus stipitatus	70089	9440526	0.00742427	85.6101
Nocardia brasiliensis	61238	8270982	0.00740396	84.9133
Saccharomonospora viridis	27639	3740405	0.00738931	85.458
Parvularcula bermudensis	19137	2617899	0.00731006	85.1764
Rhodococcus opacus	56836	7870431	0.00722146	85.5805
Shewanella oneidensis	28892	4007660	0.00720919	86.0433
Stigmatella aurantiaca	65997	9213771	0.00716287	85.8047
Clostridium autoethanogenum	25353	3647306	0.00695116	88.4823
Clostridium ljungdahlii	26797	3859635	0.00694288	88.3212
Advenella kashmirensis	21135	3049257	0.0069312	86.0629
Polynucleobacter necessarius	21612	3174915	0.00680711	89.1378
Neisseria meningitidis	18840	2781644	0.00677297	85.3811
Mycobacterium massiliense	28646	4253121	0.00673529	85.433
Desulfovibrio desulfuricans	37485	5794223	0.00646937	85.6423
Bacillus 1NLA3E	24627	3819012	0.00644853	94.9236
Arthrobacter chlorophenolicus	28535	4425888	0.00644729	86.4412
Desulfovibrio vulgaris	43667	6857199	0.00636805	85.9392
Desulfovibrio magneticus	28671	4503171	0.00636685	84.9481
Mycobacterium ulcerans	24849	3925773	0.00632971	85.5143
Mycobacterium kansasii	36548	5780139	0.00632303	85.6307
Mycobacterium smegmatis	79903	12918969	0.00618494	85.8829
Rhodococcus jostii	51558	8428992	0.00611675	85.7074
Mycobacterium africanum	22892	3795032	0.0060321	85.5099
Mycobacterium bovis	24303	4073706	0.00596582	85.5267
Carnobacterium maltaromaticum	17882	3056055	0.00585133	90.1212
Gluconobacter oxydans	34179	5853477	0.00583909	85.5318
Arthrobacter FB24	26004	4461261	0.00582885	84.8013
Haliscomenobacter hydrossis	44351	7656380	0.00579269	89.8385
Desulfovibrio gigas	19043	3303015	0.00576534	84.8235
Roseobacter denitrificans	22157	3860904	0.00573881	84.1638
Deinococcus deserti	18648	3250533	0.00573691	84.9935
Shewanella piezotolerans	25184	4525623	0.00556476	91.8013
Mycobacterium abscessus	30047	5458743	0.00550438	85.6518
Deinococcus maricopensis	17048	3100785	0.00549796	84.243
Arthrobacter phenanthrenivorans	21243	3920958	0.00541781	85.7518
Fluviicola taffensis	22455	4158146	0.00540024	89.0722
Mycobacterium liflandii	25609	4808793	0.00532545	85.5223
Salinispora tropica	24010	4550829	0.00527596	86.1636
Desulfovibrio africanus	18590	3541930	0.00524855	84.3617
Salinispora arenicola	24786	4920336	0.00503746	85.6026
Geobacter sulfurreducens	17968	3586135	0.00501041	85.6618
Mycobacterium tuberculosis	22775	4657887	0.00488956	85.6556
Mycobacterium canettii	22429	4632005	0.00484218	85.664
Vibrio vulnificus	25671	5327280	0.00481878	85.917
Bacillus subtilis	26130	5460930	0.0047849	91.1493
Methylomonas methanica	20109	4326601	0.00464776	86.8181
Vibrio harveyi	21469	4628559	0.00463838	85.7329
Mycobacterium marinum	26812	5941257	0.00451285	85.3587
Vibrio EJY3	20275	4624683	0.00438408	86.0905
Bacillus coagulans	13250	3047409	0.00434796	90.7738
Vibrio nigripulchritudo	22460	5486760	0.00409349	85.6954
Arthrobacter nitroguajacolicus	18440	4532739	0.00406818	86.2653
Granulicella mallensis	21385	5430021	0.00393829	85.6606
Opitutus terrae	20207	5251467	0.00384788	86.5529
Arthrobacter aurescens	17033	4544499	0.00374805	86.3633
Hahella chejuensis	20857	6285441	0.0033183	85.0364
Rhodococcus erythropolis	22158	6736152	0.00328942	86.2917
Sorangium cellulosum	45451	18617001	0.00244137	85.3192
Candidatus Solibacter usitatus	16920	8893125	0.00190259	84.8604
Vibrio parahaemolyticus	19913	10746222	0.00185302	86.1577
Alteromonas macleodii	22963	12796437	0.00179448	93.3094
Bacillus cereus	20444	11402676	0.00179291	94.2291
Nostoc PCC	20855	16231794	0.00128482	89.8784

## Sheet: Ugm_recruitment
Pan-genome	query_length	Pan-genome_length	Coverage	%ID average
Rubrivivax gelatinosus	4340801	4664010	0.930701	88.1747
Leptothrix cholodnii	3175330	4485078	0.707977	87.5602
Methylibium petroleiphilum	2914901	4130253	0.705744	87.6623
Ramlibacter tataouinensis	2280978	3759351	0.606748	87.2371
Anaeromyxobacter K	2152271	4564068	0.471569	87.9878
Anaeromyxobacter dehalogenans	2140679	5423082	0.394735	87.9021
Anaeromyxobacter Fw109	1802830	4717572	0.382152	87.8786
Thauera MZ1T	1465490	3984416	0.367805	86.5653
Alicycliphilus denitrificans	1654684	5214156	0.317345	86.9084
Acidovorax ebreus	1067244	3379734	0.315778	86.7471
Acidovorax citrulli	1438001	4633038	0.31038	86.9953
Acidovorax avenae	1408391	4921526	0.28617	86.9857
Azoarcus BH72	1106792	3981033	0.278016	86.5089
Acidovorax JS42	1064884	3864186	0.275578	86.7497
Cupriavidus taiwanensis	1369197	5599212	0.244534	86.3643
Bordetella pertussis	724952	3188606	0.227357	86.2855
Thiobacillus denitrificans	584691	2690022	0.217355	86.2294
Delftia acidovorans	1181268	5993472	0.197092	86.6773
Delftia Cs1	1139207	5948113	0.191524	86.7893
Burkholderia glumae	1056204	5655042	0.186772	86.1562
Aromatoleum aromaticum	750716	4089333	0.183579	86.4254
Polaromonas naphthalenivorans	854982	4661778	0.183403	86.2683
Acidovorax KKS102	801645	4583382	0.174903	86.5793
Pseudoxanthomonas suwonensis	515155	3043899	0.169242	86.2635
Cupriavidus necator	1200111	7178046	0.167192	86.2718
Azoarcus KH32C	883725	5291316	0.167014	86.6409
Dechlorosoma suillum	570112	3421987	0.166603	86.1977
Burkholderia gladioli	1240541	7537812	0.164576	86.1794
Bordetella parapertussis	802750	4918434	0.163213	86.1902
Burkholderia KJ006	886804	5526819	0.160455	85.9752
Burkholderia mallei	833153	5267850	0.158158	86.0976
Bordetella bronchiseptica	812037	5195898	0.156284	86.2242
Variovorax paradoxus	1922250	12734952	0.150943	86.9383
Burkholderia multivorans	878715	6027479	0.145785	86.3736
Burkholderia cepacia	810111	5570565	0.145427	85.9069
Pseudogulbenkiania NH8B	543925	3740850	0.145401	85.8014
Verminephrobacter eiseniae	706616	4860045	0.145393	86.4977
Chromobacterium violaceum	598665	4186275	0.143007	86.0656
Polaromonas JS666	688987	5117211	0.134641	86.4561
Burkholderia vietnamiensis	905942	6912736	0.131054	85.9736
Rhodanobacter 2APBS1	449186	3730257	0.120417	86.0462
Herbaspirillum seropedicae	576759	4865637	0.118537	85.9531
Bordetella petrii	544057	4683948	0.116154	85.9859
Thiomonas 3As	380927	3319749	0.114746	86.1452
Burkholderia thailandensis	838613	7445892	0.112628	86.0082
Burkholderia ambifaria	826812	7719627	0.107105	85.8709
Ralstonia solanacearum	1107010	10421472	0.106224	86.3803
Pseudoxanthomonas spadix	319593	3009531	0.106194	86.0978
Thiomonas intermedia	321381	3042876	0.105618	86.0588
Cupriavidus metallidurans	625460	5969901	0.104769	85.966
Dechloromonas aromatica	419953	4085901	0.102781	86.863
Burkholderia 383	758098	7541754	0.10052	85.7849
Candidatus Accumulibacter phosphatis	442587	4475013	0.0989018	86.2003
Burkholderia cenocepacia	848970	8955671	0.0947969	85.9502
Burkholderia pseudomallei	859316	9171252	0.0936967	86.0808
Pandoraea pnomenusa	431539	4630950	0.0931858	85.801
Ralstonia eutropha	1132059	12192998	0.092845	86.2672
Pandoraea RB	409470	4582023	0.0893645	85.7253
Sideroxydans lithotrophicus	244355	2747886	0.0889247	85.8927
Comamonas testosteroni	411358	4667736	0.0881279	86.1052
Starkeya novella	367385	4205505	0.0873581	86.0449
Thioalkalivibrio sulfidophilus	256580	3010593	0.0852257	86.0319
Laribacter hongkongensis	231503	2734695	0.084654	85.8137
Ralstonia pickettii	1055930	12506541	0.0844302	86.3147
Cyanobium gracile	237535	2954671	0.080393	89.7656
Thioflavicoccus mobilis	269850	3396238	0.0794556	85.858
Burkholderia CCGE1002	518336	6550268	0.079132	85.6407
Thioalkalivibrio nitratireducens	255997	3260977	0.0785032	85.907
Phenylobacterium zucineum	299890	3846912	0.077956	86.1572
Thioalkalivibrio K90mix	199765	2634807	0.0758177	86.3194
Allochromatium vinosum	248281	3286500	0.0755457	85.7987
Rhodospirillum centenum	274068	3765984	0.0727746	85.9332
Polymorphum gilvum	286438	4125498	0.0694311	85.8393
Acidiphilium cryptum	236324	3418986	0.0691211	86.1448
Bradyrhizobium ORS	432080	6354795	0.0679928	86.4691
Acidiphilium multivorum	240785	3644550	0.0660671	86.1501
Azotobacter vinelandii	295206	4478742	0.0659127	85.944
Methylobacterium radiotolerans	373078	5816710	0.064139	86.2409
Halorhodospira halophila	154286	2448792	0.0630049	86.2248
Burkholderia CCGE1001	363673	5890195	0.0617421	85.5839
Methylobacterium 4	378035	6175452	0.0612158	85.9931
Azospirillum lipoferum	361157	5911911	0.0610897	85.9332
Methylobacterium populi	299793	4934588	0.0607534	86.417
Rhodoferax ferrireducens	266225	4409424	0.0603764	85.9332
Agromonas oligotrophica	423833	7074639	0.0599088	86.61
Collimonas fungivorans	272088	4561176	0.059653	85.5446
Achromobacter xylosoxidans	733987	12401472	0.0591855	86.1338
Pseudomonas denitrificans	290671	4945980	0.0587691	85.6278
Burkholderia CCGE1003	351402	6003699	0.0585309	85.6469
Methylobacterium chloromethanicum	292968	5067917	0.0578084	85.9542
Azospirillum brasilense	374939	6525774	0.0574551	86.1608
Burkholderia phenoliruptrix	365906	6379599	0.0573556	85.5338
Burkholderia RPE64	333985	5934636	0.0562773	85.6061
Bradyrhizobium S23321	352752	6333906	0.0556926	86.9232
Novosphingobium aromaticivorans	212110	3865529	0.0548722	86.4605
Burkholderia YI23	413385	7613115	0.0542991	85.6733
Azospirillum B510	345665	6383880	0.0541465	85.94
Xanthobacter autotrophicus	260142	4825341	0.0539116	86.0955
Magnetospirillum magneticum	230567	4313163	0.0534566	86.0366
Burkholderia rhizoxinica	173010	3283629	0.0526887	85.7947
Geobacter M18	235741	4511559	0.0522527	86.2057
Bradyrhizobium BTAi1	375860	7197549	0.0522206	86.5933
Azorhizobium caulinodans	249314	4813410	0.0517957	85.8967
Caulobacter crescentus	191914	3710337	0.0517241	86.1592
Methylocystis SC2	169679	3331410	0.0509331	87.2581
Caulobacter segnis	205142	4032411	0.0508733	86.3391
Alkalilimnicola ehrlichii	148869	2936853	0.05069	85.6961
Sphingomonas wittichii	270085	5345967	0.0505213	85.8483
Methylobacterium nodulans	334383	6655062	0.0502449	85.8265
Burkholderia phymatum	356183	7228427	0.0492753	85.813
Brevundimonas subvibrioides	153816	3133740	0.0490838	85.9585
Pelobacter propionicus	171310	3596184	0.0476366	87.4403
Nitrobacter hamburgensis	178193	3812637	0.0467375	86.2612
Geobacter M21	187120	4089429	0.045757	85.7697
Oligotropha carboxidovorans	157557	3465258	0.0454676	86.1508
Sphingomonas MM	182292	4010688	0.0454516	85.8583
Myxococcus fulvus	354478	7820901	0.0453244	86.7095
Geobacter bemidjiensis	179751	4033590	0.0445635	85.9724
Burkholderia phytofirmans	303868	6952095	0.0437088	85.3325
Methylococcus capsulatus	124871	2918073	0.0427923	85.9291
Caulobacter K31	216767	5107995	0.0424368	85.8911
Geobacter metallireducens	150904	3570588	0.0422631	86.3015
Burkholderia xenovorans	346038	8231991	0.0420358	85.5095
Pseudomonas resinovorans	234333	5660481	0.0413981	85.6822
Hyphomicrobium nitrativorans	124023	3021966	0.0410405	85.8536
Xanthomonas fuscans	163040	4090233	0.0398608	85.8133
Methylobacterium extorquens	274164	7018134	0.0390651	85.9982
Novosphingobium PP1Y	178279	4565937	0.0390454	85.7787
Myxococcus xanthus	320488	8272719	0.0387403	86.834
Corallococcus coralloides	355556	9222303	0.0385539	86.6889
Paracoccus denitrificans	177367	4629837	0.0383096	85.9719
Xanthomonas citri	173914	4559988	0.0381391	85.7473
Halomonas elongata	132415	3506337	0.0377645	85.6395
Nitrobacter winogradskyi	102525	2742819	0.0373794	86.0271
Pseudomonas fulva	160729	4357742	0.0368836	85.7594
Mesorhizobium opportunistum	217204	5901561	0.0368045	86.0266
Bordetella avium	120556	3285650	0.0366917	85.4839
Mesorhizobium australicum	195349	5357340	0.0364638	85.8732
Stenotrophomonas maltophilia	276871	7664252	0.036125	85.953
Bradyrhizobium japonicum	423253	11721279	0.0361098	86.8135
Rhodospirillum photometricum	115886	3215701	0.0360376	87.6958
Xanthomonas albilineans	118184	3323748	0.0355574	85.8633
Tistrella mobilis	201089	5788194	0.0347412	85.543
Myxococcus stipitatus	324403	9440526	0.0343628	86.7157
Stigmatella aurantiaca	312455	9213771	0.0339117	87.0622
Sphingobium SYK	129753	3859698	0.0336174	86.0283
Geobacter sulfurreducens	120434	3586135	0.0335832	87.1982
Erythrobacter litoralis	92708	2784804	0.0332907	85.9129
Pseudomonas entomophila	172677	5204502	0.0331784	85.6791
Sphingopyxis alaskensis	99993	3034677	0.0329501	85.8806
Pseudomonas aeruginosa	311214	9458254	0.032904	85.8503
Sulfuricella denitrificans	94566	2899869	0.0326104	85.1743
Xanthomonas axonopodis	167595	5251614	0.031913	85.758
Rhizobium NGR234	182054	5773695	0.0315316	85.8678
Sphingobium japonicum	124385	3945969	0.031522	86.1552
Mesorhizobium ciceri	181125	5774796	0.0313647	86.0191
Micrococcus luteus	67823	2175066	0.031182	86.1325
Haliangium ochraceum	249168	8040639	0.0309886	86.0364
Chromohalobacter salexigens	101234	3300135	0.0306757	85.6516
Isoptericola variabilis	90226	2967297	0.0304068	86.0869
Mesorhizobium loti	191357	6483141	0.0295161	86.0616
Rhodobacter capsulatus	101149	3474144	0.0291148	86.1284
Gluconacetobacter diazotrophicus	111193	3870958	0.0287249	86.1342
Geodermatophilus obscurus	127904	4470098	0.0286132	85.6817
Thiocystis violascens	117156	4104051	0.0285464	85.7398
Methylocella silvestris	100748	3665544	0.0274851	85.7112
Xanthomonas oryzae	126159	4636230	0.0272115	85.9241
Nocardioides JS614	128105	4771848	0.026846	85.9511
Desulfarculus baarsii	87398	3290154	0.0265635	85.457
Oceanithermus profundus	59791	2256627	0.0264957	85.3545
Thermaerobacter marianensis	62728	2395983	0.0261805	85.6522
Rhodospirillum rubrum	102076	3912573	0.0260892	85.3714
Frateuria aurantia	80281	3108164	0.0258291	86.2748
Pseudomonas monteilii	131913	5112273	0.0258032	85.5175
Cellvibrio gilvus	82421	3204297	0.025722	86.3292
Spiribacter UAH	46404	1808280	0.025662	85.6049
Cellulomonas fimi	97760	3827334	0.0255426	86.3725
Thermomonospora curvata	118356	4713408	0.0251105	85.9518
Gordonibacter pamelaeae	44594	1776528	0.0251018	85.2841
Parvibaculum lavamentivorans	86856	3469653	0.0250331	85.6511
Sphingobium chlorophenolicum	100474	4025931	0.0249567	85.889
Rhodobacter sphaeroides	195912	7910745	0.0247653	85.8234
Magnetospirillum gryphiswaldense	97208	3934818	0.0247046	85.8006
Geobacter uraniireducens	106987	4336231	0.0246728	87.2245
Symbiobacterium thermophilum	72989	3008181	0.0242635	85.1574
Pseudomonas mendocina	189380	7933947	0.0238696	85.8497
Cellulomonas flavigena	88184	3700926	0.0238276	85.9762
Geobacter lovleyi	85673	3603375	0.0237758	89.9191
Blastococcus saxobsidens	101445	4336599	0.0233928	85.727
Thermobispora bispora	81380	3492543	0.0233011	85.5172
Opitutus terrae	122238	5251467	0.0232769	86.6501
Modestobacter marinus	117131	5038674	0.0232464	85.702
Xylanimonas cellulosilytica	79663	3474324	0.0229291	85.8151
Intrasporangium calvum	80654	3592482	0.0224508	85.7935
Dinoroseobacter shibae	83102	3858330	0.0215383	85.401
Kytococcus sedentarius	51962	2433894	0.0213493	85.759
Ectothiorhodospiraceae bacterium	34262	1652232	0.0207368	86.403
Rhodomicrobium vannielii	67573	3304248	0.0204503	85.5311
Ruegeria pomeroyi	84207	4126446	0.0204067	86.1043
Brachybacterium faecium	65578	3215674	0.0203932	85.899
Propionibacterium acidipropionici	63546	3180102	0.0199824	85.8449
Desulfovibrio desulfuricans	111478	5794223	0.0192395	86.04
Nocardia farcinica	107295	5652774	0.0189809	85.5195
Kitasatospora setae	141515	7493553	0.0188849	85.8333
Kineococcus radiotolerans	84034	4467861	0.0188086	85.9242
Desulfovibrio aespoeensis	59488	3189270	0.0186525	86.2561
Pseudonocardia dioxanivorans	118966	6462061	0.0184099	85.9014
Pseudomonas VLB120	94303	5166432	0.018253	85.5227
Desulfobulbus propionicus	61529	3374414	0.018234	87.3342
Sinorhizobium fredii	163735	9020451	0.0181515	85.8947
Conexibacter woesei	106263	5969418	0.0178012	86.0535
Corynebacterium maris	44611	2507961	0.0177878	85.3099
Leisingera methylohalidivorans	69449	3911874	0.0177534	86.0308
Xanthomonas campestris	158779	9028203	0.017587	85.6872
Heliobacterium modesticaldum	44265	2518032	0.0175792	86.6904
Chelativorans BNC1	76626	4372665	0.0175239	86.4289
Eggerthella lenta	54794	3127671	0.0175191	85.3591
Clavibacter michiganensis	75798	4373448	0.0173314	86.0234
Sanguibacter keddieii	63708	3833301	0.0166196	85.6169
Streptomyces albus	97391	5902164	0.0165009	85.5508
Micromonospora L5	101920	6222119	0.0163803	85.7224
Comamonadaceae bacterium	43723	2672400	0.0163609	85.9804
Saccharopolyspora erythraea	111731	6882946	0.016233	85.8264
Acidimicrobidae bacterium	72651	4486491	0.0161933	85.6466
Micromonospora aurantiaca	100383	6265581	0.0160213	85.6314
Phycisphaera mikurensis	54322	3417819	0.0158938	84.4514
Kocuria rhizophila	37820	2385912	0.0158514	85.8666
Pseudomonas brassicacearum	94634	6014859	0.0157334	85.8477
Pseudomonas ND6	87969	5633352	0.0156157	85.9772
Sinorhizobium meliloti	131580	8430495	0.0156076	85.8792
Rhizobium tropici	89220	5717874	0.0156037	85.906
Desulfovibrio africanus	54516	3541930	0.0153916	85.6177
Corynebacterium halotolerans	42020	2772984	0.0151534	85.1557
Nakamurella multipartita	76468	5078277	0.0150579	85.6674
Leifsonia xyli	37364	2515047	0.0148562	85.6137
Nocardiopsis dassonvillei	81447	5496225	0.0148187	85.4682
Olsenella uli	25827	1779849	0.0145108	85.2716
Actinosynnema mirum	103510	7182923	0.0144106	85.5364
Kribbella flavida	96262	6788841	0.0141794	85.7256
Streptomyces collinus	92873	6673698	0.0139163	85.2586
Desulfovibrio magneticus	62475	4503171	0.0138736	85.5081
Propionibacterium propionicum	38815	2823189	0.0137486	85.8203
Mycobacterium chubuense	77768	5676747	0.0136994	85.6076
Pseudomonas stutzeri	190457	13948735	0.0136541	85.8921
Methanoregula formicicum	33181	2438463	0.0136073	89.0619
Frankia EuI1c	102469	7555950	0.0135614	85.82
Frankia alni	87360	6478494	0.0134846	85.4916
Thermobifida fusca	41583	3084381	0.0134818	85.4249
Streptosporangium roseum	118529	8841484	0.013406	85.8379
Taylorella asinigenitalis	21371	1618089	0.0132076	93.1337
Mycobacterium avium	69528	5267805	0.0131987	85.858
Pseudomonas poae	63495	4841427	0.0131149	85.5529
Deinococcus gobiensis	48352	3694914	0.0130861	85.5198
Rhodococcus equi	59284	4547415	0.0130369	85.2909
Sorangium cellulosum	242677	18617001	0.0130352	86.3665
Adlercreutzia equolifaciens	32347	2503338	0.0129215	84.7431
Maricaulis maris	38754	3027633	0.0128001	85.5682
Agrobacterium radiobacter	80678	6321999	0.0127615	85.7666
Sinorhizobium medicae	72308	5730932	0.0126171	85.6799
Microbacterium testaceum	45899	3644292	0.0125948	85.77
Streptomyces cattleya	91516	7292085	0.01255	85.8305
Beutenbergia cavernae	53986	4314435	0.0125129	85.7927
Catenulispora acidiphila	115067	9271437	0.0124109	85.5832
Oceanimonas GK1	38322	3094857	0.0123825	85.1151
Hyphomonas neptunium	41234	3341064	0.0123416	85.2767
Propionibacterium freudenreichii	27227	2216619	0.0122831	84.4294
Methylobacillus flagellatus	31234	2549745	0.0122499	85.3462
Mycobacterium JLS	67894	5549799	0.0122336	85.4591
Mycobacterium MCS	66049	5416359	0.0121944	85.3709
Mycobacterium JDM601	51219	4202805	0.0121869	85.535
Hyphomicrobium denitrificans	77668	6396500	0.0121423	86.4349
Frankia symbiont	48003	3966965	0.0121007	85.6912
Streptomyces venezuelae	89110	7416000	0.0120159	85.3847
Saccharothrix espanaensis	100501	8368944	0.0120088	85.7151
Haemophilus parainfluenzae	22229	1857732	0.0119657	91.7866
Hyphomicrobium MC1	50171	4226400	0.0118709	85.7255
Alcanivorax dieselolei	51393	4374693	0.0117478	85.9111
Mycobacterium KMS	65690	5629383	0.0116691	85.3649
Streptomyces coelicolor	91066	7884895	0.0115494	85.4465
Helicobacter felis	17669	1531627	0.0115361	89.115
Actinoplanes missouriensis	91159	7926330	0.0115008	85.6273
Nocardiopsis alba	58321	5082476	0.0114749	85.7787
Rhodococcus pyridinivorans	51926	4545993	0.0114224	85.4247
Tsukamurella paurometabola	44966	4026300	0.0111681	85.8707
Aeromonas hydrophila	52428	4701402	0.0111516	86.2469
Mycobacterium vanbaalenii	64931	5828292	0.0111407	85.9551
Mycobacterium yongonense	56240	5061573	0.0111112	85.628
Streptomyces griseus	81523	7414584	0.010995	85.3534
Verrucosispora maris	65011	5915463	0.01099	86.0183
Mycobacterium gilvum	64845	5920716	0.0109522	85.2738
Streptomyces SirexAA	70489	6437431	0.0109499	85.6032
Streptomyces flavogriseus	71839	6608106	0.0108713	85.2896
Pseudomonas TKP	66916	6161373	0.0108606	85.2854
Rhizobium etli	105582	9754299	0.0108242	85.9152
Geobacter FRC	41636	3862863	0.0107785	87.4597
Streptomyces PAMC26508	72455	6722319	0.0107783	85.3295
Gemmatimonas aurantiaca	45856	4268871	0.010742	85.6971
Methanosaeta concilii	25623	2390925	0.0107168	88.7793
Actinoplanes N902	88292	8295825	0.0106429	85.7876
Frankia EAN1pec	77971	7330446	0.0106366	85.8326
Amycolatopsis mediterranei	97984	9220053	0.0106273	85.7499
Frankia CcI3	47722	4508796	0.0105842	85.3309
Rhodopseudomonas palustris	256179	24285328	0.0105487	86.5889
Marinithermus hydrothermalis	21571	2050539	0.0105197	85.4832
Rhizobium IRBG74	51020	4871064	0.0104741	85.0352
Brucella ceti	26918	2574879	0.0104541	86.2188
Streptomyces hygroscopicus	89006	8532309	0.0104316	85.4862
Segniliparus rotundus	29575	2841027	0.01041	84.9887
Saccharomonospora viridis	38559	3740405	0.0103088	85.1189
Mycobacterium indicus	49716	4997634	0.00994791	85.2914
Actinoplanes SE50	80796	8126247	0.0099426	85.9964
Desulfovibrio gigas	32705	3303015	0.00990156	85.5514
Actinoplanes friuliensis	82467	8426865	0.0097862	85.6227
Mycobacterium MOTT36Y	48990	5012298	0.00977396	85.301
Bifidobacterium bifidum	20696	2175522	0.00951312	84.9671
Deinococcus radiodurans	27717	2915222	0.00950768	85.5037
Agrobacterium H13	46848	4938447	0.00948638	85.9182
Pelagibacterium halotolerans	33077	3500208	0.00945001	85.7793
Streptomyces fulvissimus	66107	7003092	0.00943969	85.3628
Microlunatus phosphovorus	48101	5105058	0.00942222	85.5588
Brucella ovis	24060	2562144	0.00939057	86.4775
Streptomyces scabiei	81379	8708610	0.00934466	85.6969
Corynebacterium variabile	27249	2920179	0.00933128	85.302
Nocardia cyriacigeorgica	50103	5375238	0.00932108	85.4698
Acidobacterium capsulatum	32658	3541383	0.00922182	85.4085
Agrobacterium fabrum	45712	4987824	0.00916472	85.0447
Gordonia polyisoprenivorans	47406	5182839	0.00914672	85.0884
Rhizobium leguminosarum	105101	11508188	0.00913271	86.0761
Mycobacterium intracellulare	50773	5566983	0.00912038	85.2419
Corynebacterium terpenotabidum	22086	2431278	0.00908411	84.7573
Acidithiobacillus caldus	24000	2643087	0.00908029	85.3773
Herminiimonas arsenicoxydans	27042	3001131	0.0090106	84.7979
Asticcacaulis excentricus	33696	3748472	0.00898926	85.0498
Stackebrandtia nassauensis	55770	6222591	0.0089625	85.3913
Amycolatopsis orientalis	72333	8093877	0.00893676	85.5531
Gordonia bronchialis	39926	4478220	0.0089156	85.297
Synechococcus CC9605	19184	2166657	0.00885419	86.8089
Streptomyces davawensis	74885	8521191	0.00878809	85.2559
Brucella microti	25264	2880237	0.0087715	86.3099
Brucella pinnipedialis	24965	2847954	0.00876594	86.378
Rubrobacter xylanophilus	25568	2928492	0.00873077	84.3677
Streptomyces avermitilis	68288	7829232	0.00872218	85.2977
Paracoccus aminophilus	36786	4279416	0.00859603	85.4771
Aeromonas veronii	33490	3896061	0.00859586	86.8293
Streptomyces bingchenggensis	88387	10285431	0.00859342	85.8839
Sphaerobacter thermophilus	29081	3406167	0.00853775	84.1678
Gordonia KTR9	44478	5241486	0.00848576	85.5115
Desulfomicrobium baculatum	29712	3518268	0.00844506	85.6278
Mycobacterium rhodesiae	49142	5845188	0.00840726	85.8852
Streptomyces violaceusniger	79300	9450999	0.00839065	85.5486
Rhodothermus marinus	29174	3482300	0.0083778	84.6608
Desulfovibrio vulgaris	57076	6857199	0.00832352	86.4561
Nocardia brasiliensis	68816	8270982	0.00832017	85.3119
Brucella suis	24334	2925063	0.00831914	86.2876
Brucella canis	24479	2954007	0.00828671	86.3081
Brucella abortus	23987	2937096	0.00816691	86.4492
Thermus oshimai	18014	2227013	0.00808886	85.7776
Brucella melitensis	24767	3074559	0.00805546	86.4056
Haemophilus influenzae	22388	2823640	0.00792877	91.9063
Streptomyces rapamycinicus	78155	10350237	0.00755103	85.3897
Deinococcus geothermalis	20874	2858034	0.00730362	85.6632
Pusillimonas T7	25572	3552993	0.00719731	84.6789
Mycobacterium VKM	34848	4883727	0.00713553	85.7363
Methylovorus glucosetrophus	19755	2805201	0.00704228	85.3122
Janthinobacterium Marseille	24804	3666477	0.00676508	86.1851
Salinispora arenicola	32995	4920336	0.00670584	85.8393
Mycobacterium africanum	25178	3795032	0.00663446	85.4316
Thermobacillus composti	23620	3593148	0.00657362	84.5823
Mycobacterium kansasii	36580	5780139	0.00632857	85.4867
Granulicella mallensis	34360	5430021	0.00632778	86.1115
Deinococcus maricopensis	19328	3100785	0.00623326	84.772
Mycobacterium bovis	25375	4073706	0.00622897	85.4038
Rhodococcus opacus	48341	7870431	0.0061421	85.5006
Aeromonas salmonicida	24208	4008668	0.00603891	86.8036
Arthrobacter chlorophenolicus	26491	4425888	0.00598547	85.7111
Haliscomenobacter hydrossis	45190	7656380	0.00590227	89.6573
Rhodococcus jostii	49054	8428992	0.00581968	85.3477
Terriglobus roseus	23967	4209933	0.00569296	86.7026
Salinispora tropica	25543	4550829	0.00561282	86.0826
Arthrobacter phenanthrenivorans	21940	3920958	0.00559557	86.0801
Synechococcus WH	24136	4353264	0.00554435	86.5963
Mycobacterium canettii	25313	4632005	0.0054648	84.8404
Klebsiella pneumoniae	43232	8033544	0.00538144	90.2739
Mycobacterium ulcerans	20324	3925773	0.00517707	85.1249
Vibrio alginolyticus	22559	4402374	0.00512428	91.7843
Mycobacterium smegmatis	65914	12918969	0.00510211	86.2372
Serratia marcescens	42731	8421129	0.00507426	85.0376
Ochrobactrum anthropi	22723	4479292	0.0050729	86.1322
Deinococcus peraridilitoris	19031	3786618	0.00502586	86.0419
Ruegeria TM1040	18201	3645699	0.00499246	86.6021
Syntrophobacter fumaroxidans	19671	4044771	0.00486332	87.4932
Mycobacterium tuberculosis	21709	4657887	0.0046607	85.366
Candidatus Solibacter usitatus	40663	8893125	0.00457241	85.9466
Mycobacterium massiliense	19326	4253121	0.00454396	85.4573
Candidatus Koribacter versatilis	22719	5043942	0.00450422	84.9931
Acidobacterium MP5ACTX9	21203	4711377	0.00450038	85.4402
Mycobacterium liflandii	21627	4808793	0.00449739	85.0872
Pseudomonas putida	115750	26432418	0.00437909	86.6059
Klebsiella oxytoca	25116	5832189	0.00430644	85.3345
Mycobacterium marinum	25571	5941257	0.00430397	84.9117
Acinetobacter baumannii	26384	6218052	0.00424313	91.6051
Mycobacterium abscessus	21797	5458743	0.00399304	85.5827
Agrobacterium vitis	19478	5341029	0.00364686	85.1584
Singulisphaera acidiphila	27237	7770076	0.00350537	85.7728
Pseudomonas fluorescens	80665	27131664	0.00297309	86.19
Rhodococcus erythropolis	18291	6736152	0.00271535	85.5233
Pseudomonas syringae	33558	12402408	0.00270576	84.9533
Legionella pneumophila	12423	4942818	0.00251334	92.0485
Salmonella enterica	23402	9780649	0.00239268	86.6423
Escherichia coli	23155	13406449	0.00172715	91.4931
Cyanothece PCC	22566	20693698	0.00109048	89.853
